# Supplementary material
Source: PubMed Central journal article supplement (PMC1955822)

20 mM trehalose

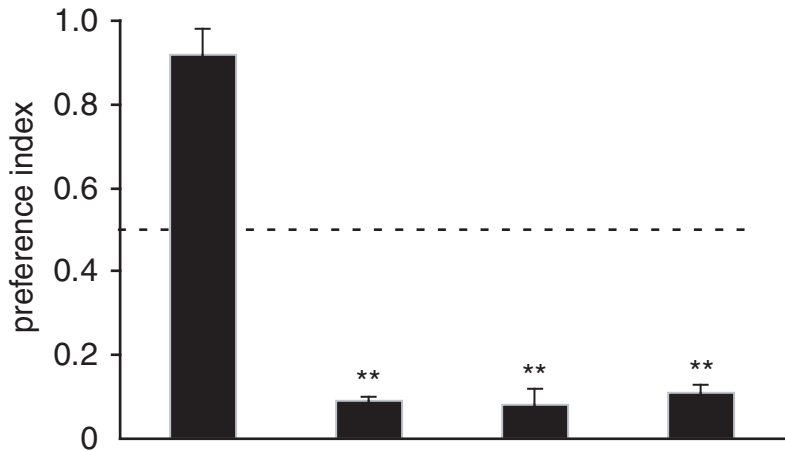

2 mM fructose

wild-type

Df(3L)GN34/Gr64ab

Df(3L)GN24/Gr64ab

Gr64ab

Supplement: pnas_0702421104_3.pdf [file pnas_0702421104_3.pdf]
